# Supplementary material
Source: Elsevier journal article supplement (https://www.sciencedirect.com/science/article/pii/S003383382100045X)
Supplement: mmc1 [file S003383382100045X:mmc1.doc]

**Anexo 1**

**Encuesta de resonancia magnética fetal en España**

Dirección de correo electrónico:

Centro de trabajo:

A qué subespecialidad/es de radiología te dedicas?

¿En qué ciudad trabajas?

¿Qué tipo de trabajo realizas? ¿Medicina pública, medicina privada o de gestión privada con pacientes del sistema público?

¿Es un centro de tercer nivel o de referencia para patología fetal?

¿Tenéis comités multidisciplinares fetales en vuestro hospital?

¿Realizas RM fetal?

¿Cuántos radiólogos de tu centro informan RM fetal?

¿Trabajas con RM de 1.5 T, 3 T o ambas?

¿Cuántos estudios hacéis aproximadamente al año?

¿A qué edad gestacional soléis hacer la RM fetal?

¿Qué proporción de estudios son RM fetal del SNC?

¿Sedáis a las pacientes antes del estudio? ¿Cómo?

¿Se realiza ecografía fetal antes de la RM? ¿Quién la realiza?

¿Cómo se decide la indicación de la RM fetal?

¿A qué porcentaje de pacientes se les repite la RM fetal? ¿Motivos?

¿Realizáis TC fetal? ¿Cuántas al año?

¿Estáis haciendo investigación en RM fetal (y en qué)?

¿Qué os gustaría que investigáramos como grupo español de RM fetal?

¿Estarías dispuesto a participar colaborando con iniciativas docentes o de investigación de otros hospitales?

¿Cada cuánto tiempo os gustaría que nos reunamos el grupo de RM fetal? ¿Formato, 1 o 2 días?

Que formato os gustaría: *a*) charlas magistrales educacionales, *b*) talleres, *c*) comunicaciones científicas

¿Debería ser un grupo multidisciplinar?/invitar puntualmente a otros especialistas de medicina materno-fetal?

¿Estarías interesado en que se acrediten centros para la formación en imagen fetal?

Por favor, comenta libremente otras ideas, relación con la SERPE y otras sociedades científicas españolas, etc.

…………………………………………………………………………………………………………………………………………………………………………………………………………………………………………………………………………………………………………………………………………………………………………………………………………………………………………………………………………………………………………………………………………………………………………………………………………………………………………………………………………
